# Supplementary material for: Synthesis and self-assembly of a novel block copolymer poly(N-vinylcaprolactam)-b-poly(3- hydroxybutyrate-co-3-hydroxyvalerate) (PNVCL-b-PHBHV) by the combination of RAFT/MADIX and click chemistry techniques
Source: Research Square preprint supplement (doi:10.21203/rs.3.rs-6328656/v1), 2025-04-24
Supplement: Supplementary file 1 [file 47f38e7338fac3495948e34e.docx]

# Synthesis and self-assembly of a novel block copolymer poly(*N*-vinylcaprolactam)-*b*-poly(3-hydroxybutyrate-*co*-3-hydroxyvalerate) (PNVCL-*b*-PHBHV) by the combination of RAFT/MADIX and click chemistry techniques

Rodolfo Minto de Moraes*, Layde Teixeira de Carvalho, Gizelda Maria Alves, Simone de Fátima Medeiros, Amilton Martins dos Santos

Engineering School of Lorena, University of São Paulo, EEL-USP, Laboratory of Polymers, Department of Chemical Engineering, Estrada Municipal do Campinho, 100, 12602-810, Lorena, SP, Brazil.

* Correspondence: [rodolfommoraes@hotmail.com](mailto:rodolfommoraes@hotmail.com)

**Supporting Information**

**Table S1** Monitoring of *M*n SEC and *Đ* of alkyne-PHBHV during the transesterification reaction of PHBHV with propargyl alcohol: ReT(1) reaction

| **ReT(1)** | | |
| --- | --- | --- |
| t (h) | *M*n SEC a (g.mol-1) | *Đ* a |
| 0 | 114873 | 2.86 |
| 2 | 22461 | 2.49 |
| 4 | 11682 | 2.17 |
| 6 | 8412 | 1.83 |
| 8 | 5855 | 1.76 |
| 10 | 4736 | 1.64 |
| 12 | 4049 | 1.54 |

a Determined by SEC in chloroform





**Fig. S1** Plots of **(a)** reaction time *vs* monomer conversion, and **(b)** number-average molar mass (*M*n) and dispersity (*Ð*) *vs* monomer conversion in the RAFT/MADIX polymerization of NVCL in 1.4-dioxane using [NVCL]:[CTA]:[AIBN] molar ratio = 300:1:0.25 at 70 °C. The *M*n and *Đ* values were determined by HPLC in THF and TEA (3% v/v).


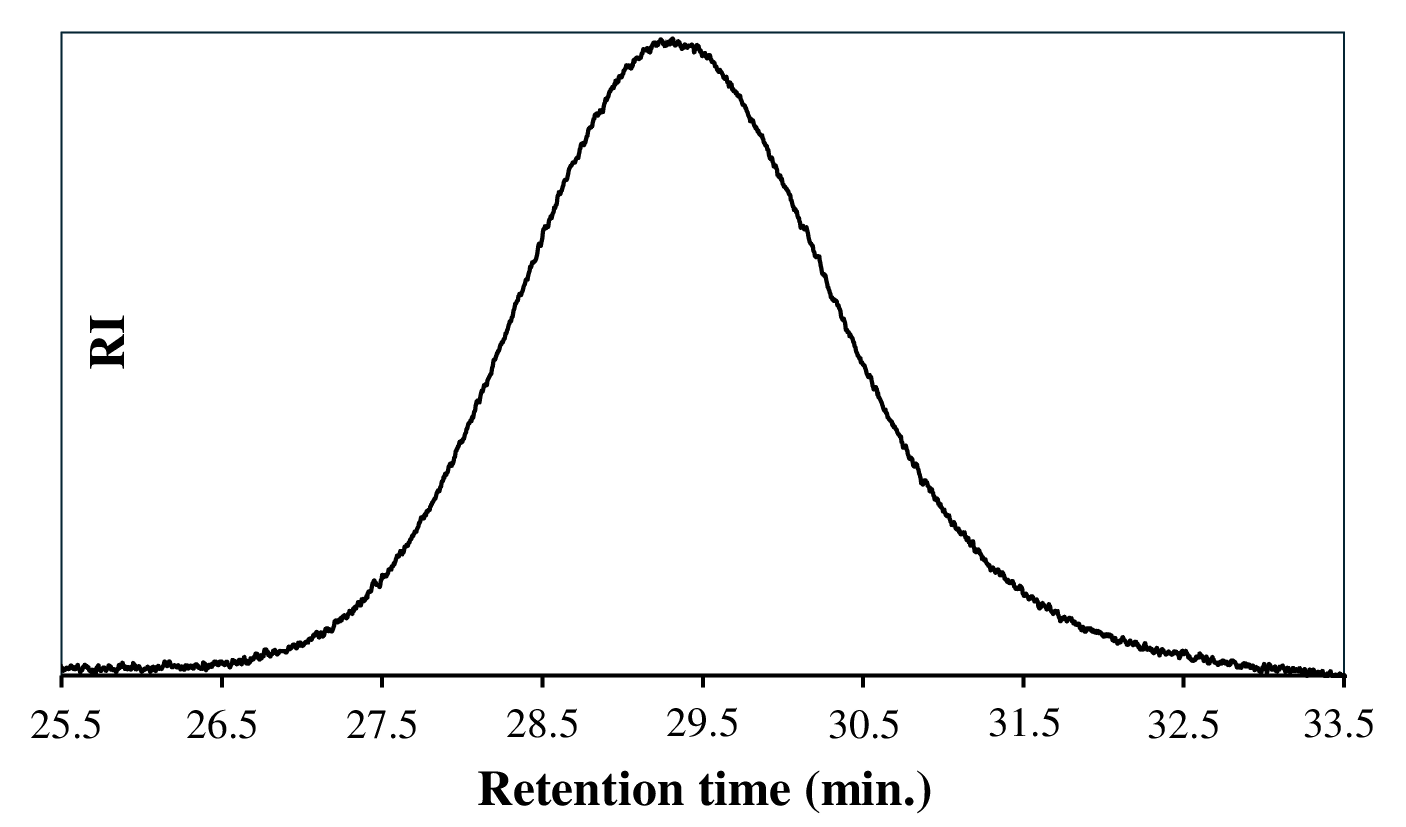


**Fig. S2** SEC chromatogram of PNVCL-N3 (1)





**Fig. S3** SEC chromatogram of **(a)** alkyne-PHBHV (1) and **(b)** alkyne-PHBHV (2)
